# Supplementary material for: Parent and Family Functioning in Pediatric Inflammatory Bowel Disease
Source: MDPI journal article supplement (doi:10.3390/children7100188), 2020-10-17
Supplement: s1 [file s1]

| First Author (Year) | Parent/Family variable(s) examined             | Child variable(s) examined                  | Sample Characteristics                                                                                                                               | Comparison Group(s) (if applicable) | Measures Used                                                                                    | Primary Results                                                                                                                                                                                                                                                                                                                                                                                        |
|---------------------|------------------------------------------------|---------------------------------------------|------------------------------------------------------------------------------------------------------------------------------------------------------|-------------------------------------|--------------------------------------------------------------------------------------------------|--------------------------------------------------------------------------------------------------------------------------------------------------------------------------------------------------------------------------------------------------------------------------------------------------------------------------------------------------------------------------------------------------------|
| Ahola-Kohut (2018)  | Pain Catastrophizing                           | HRQOL<br>Pain Intensity<br>Disease Activity | Canada<br>$N=71$<br>Youth ( $M_{age} = 15.21 \pm 1.49$ ) & Caregivers<br><br>CD $n=45$<br>UC $n=24$<br>IBD-U = 2                                     | N/A                                 | Not Reported                                                                                     | Parent pain catastrophizing (rumination about child pain) was significantly associated with lower youth HRQOL                                                                                                                                                                                                                                                                                          |
| Baudino (2018)      | Illness Uncertainty                            | Depression,<br>Disease Activity             | United States<br>$N=85$<br>Youth ( $M_{age} = 15.75 \pm 1.51$ ; 74.1% White) & Caregivers ( $M_{age} = 43.9 \pm 6.7$ )<br><br>CD $n=50$<br>UC $n=35$ | N/A                                 | CDI-2,<br>Child Uncertainty in Illness Scale,<br>Parent Perceptions of Uncertainty Scale,<br>PGA | Parent illness uncertainty has a significant influence on youth illness uncertainty appraisals, which in turn relates to elevated child depressive symptoms<br>Parent illness uncertainty related to worse youth disease activity                                                                                                                                                                      |
| Burke (1994)        | Psychosocial Functioning<br>Family Functioning | N/A                                         | United States<br>$N=72$<br>Mothers ( $M_{age} = 39.5 \pm 5.12$ ) of youth with IBD ( $M_{age} = 12.22 \pm 2.71$ )<br><br>CD $n=49$<br>UC $n=23$      | Cystic fibrosis (CF)                | A-SADS-L,<br>FILE,<br>FRI                                                                        | 51% of IBD mothers reported a history of depression compared to 41% of CF mothers<br>First episode of maternal depression preceded IBD diagnosis<br>Maternal depression associated with other psychopathology, life events, and family strains<br>Higher prevalence of Obsessive Compulsive Disorder in IBD mothers<br>No significant differences in parent psychosocial functioning between CD and UC |
| Caes (2019)         | Family Functioning                             | HRQOL<br>Pain Intensity                     | Canada<br>$N=60$<br>Youth ( $M_{age} = 13.37 \pm 2.54$ ) & Parents ( $M_{age} = 45.30 \pm 6.13$ )<br><br>CD $n=41$<br>UC $n=17$<br>IBD-U $n=2$       | N/A                                 | Faces Pain Scale-Revised,<br>FACES-IV,<br>IMPACT-III,<br>PGA                                     | Parents reported significantly higher levels of family cohesion and communication, but significantly lower satisfaction as compared to youth<br>Higher youth-reported family satisfaction and lower pain intensity related to better youth HRQOL<br>Higher parent-reported family cohesion and satisfaction indirectly related to youth HRQOL through lower pain intensity                             |

|                 |                                        |                                                         |                                                                                                                                                                                              |                  |                                                                            |                                                                                                                                                                                                                                                                                                                                                                                                                                                                                                                                                                                                                                                                        |
|-----------------|----------------------------------------|---------------------------------------------------------|----------------------------------------------------------------------------------------------------------------------------------------------------------------------------------------------|------------------|----------------------------------------------------------------------------|------------------------------------------------------------------------------------------------------------------------------------------------------------------------------------------------------------------------------------------------------------------------------------------------------------------------------------------------------------------------------------------------------------------------------------------------------------------------------------------------------------------------------------------------------------------------------------------------------------------------------------------------------------------------|
| Diederer (2018) | Parental Distress                      | HRQOL<br>Disease Activity                               | Netherlands<br>N=87<br>Youth (Median age = 15.2, IQR = 13.4-16.5)<br>Parents (Median age = 45.8, IQR = 42.6-50.6)<br><br>CD <i>n</i> =58<br>UC <i>n</i> =29                                  | Healthy Controls | Distress Thermometer for Parents, PedsQL, PUCAI, shPCDAI                   | 47% of IBD parents reported clinically elevated distress, though this was not significantly different from parents of healthy controls<br>Similar levels of parental distress between IBD parents and healthy control parents, but IBD parents reported more frequent parenting problems<br>Increased parental distress associated with lower child HRQOL and shorter time since last disease flare<br>Parental distress mediated the relationship between shorter duration since child's last disease flare and child HRQOL, such that shorter time since the last flare was associated with higher parental distress, which in turn was related to lower child HRQOL |
| Engstrom (1991) | Parental Distress<br>Social Support    | N/A                                                     | Sweden<br>N=20<br>Youth ( <i>M</i> <sub>age</sub> = 16.5)<br>Mothers ( <i>M</i> <sub>age</sub> = 42.7)<br>Fathers ( <i>M</i> <sub>age</sub> = 44.2)<br><br>CD <i>n</i> =9<br>UC <i>n</i> =11 | Healthy Controls | ISSI, SCL-90                                                               | IBD mothers report higher levels of parental distress, somatization, interpersonal sensitivity, depression, and anxiety than healthy control mothers<br>IBD fathers report similar levels of parental distress to healthy control fathers<br>IBD mothers and fathers report lower levels of social support compared to healthy control mothers and fathers                                                                                                                                                                                                                                                                                                             |
| Gray (2013)     | Parenting Stress<br>Family Functioning | Emotional/Behavioral<br>Functioning<br>Disease Severity | United States<br>N=130<br>Youth ( <i>M</i> <sub>age</sub> = 15.64±1.36; 81.5% White) & Caregivers<br><br>CD <i>n</i> =100<br>UC <i>n</i> =30                                                 | Normative Sample | CBCL, YSR, FAD, LCAI, PIP, shPCDAI,                                        | Higher parenting stress is associated with higher levels of parent-report internalizing and externalizing symptoms.<br>Parents of youth with borderline or clinical levels of internalizing symptoms had significantly more parenting stress than parents of youth with normal levels.<br>Higher parenting stress associated with higher levels of youth-report internalizing but not externalizing symptoms<br>In CD patients, higher parenting stress was associated with higher levels of disease severity. No relationship found in UC.<br>Poorer family functioning associated with increased parenting stress                                                    |
| Gray (2015)     | Parenting Stress                       | HRQOL<br>Disease Activity                               | United States<br>N=99<br>Youth ( <i>M</i> <sub>age</sub> = 15.16±1.37; 79.8% White) & Caregivers<br><br>CD <i>n</i> =99                                                                      | Pediatric cancer | IMPACT-III, PIP, shPCDAI                                                   | Difficulty with, but not frequency of, parenting stress was significantly lower in Crohn's disease than in pediatric cancer<br>Higher parenting stress associated with lower youth HRQOL<br>Higher disease activity and lower youth HRQOL mediated by parenting stress due to the frequency and difficulty of medical stressors                                                                                                                                                                                                                                                                                                                                        |
| Greenley (2009) | QoL                                    | Disease Activity<br>QoL                                 | United States<br>N=49<br>Youth ( <i>M</i> <sub>age</sub> = 14.96±2.25; 90% White) &                                                                                                          | Normative Sample | CHQ-CF 87, Myren modification of the Harvey Bradshaw Simple Index, RAND 36 | Parents of youth with IBD reported higher/better QoL in 5 of 8 domains when compared to normative group: physical functioning, role limitations due to physical health, role limitations due to emotional problems, energy/fatigue, and general health<br>Greater youth disease activity was associated with lower parent QoL in mental health and physical health domains                                                                                                                                                                                                                                                                                             |

|                  |                                        |                                |                                                                                                                                                                       |                                                                                    |                              |                                                                                                                                                                                                                                                                                                                                                                                                                                                                                                                                                                                                                                                                                                                                                                                                                                                                                                  |
|------------------|----------------------------------------|--------------------------------|-----------------------------------------------------------------------------------------------------------------------------------------------------------------------|------------------------------------------------------------------------------------|------------------------------|--------------------------------------------------------------------------------------------------------------------------------------------------------------------------------------------------------------------------------------------------------------------------------------------------------------------------------------------------------------------------------------------------------------------------------------------------------------------------------------------------------------------------------------------------------------------------------------------------------------------------------------------------------------------------------------------------------------------------------------------------------------------------------------------------------------------------------------------------------------------------------------------------|
|                  |                                        |                                | Parents ( $M_{age} = 42.86 \pm 6.33$ ; 92% White)                                                                                                                     |                                                                                    |                              | Higher youth mental and physical OQL was associated with higher parent QoL in the mental health domain<br>Parent QoL rated as best in social and physical domains and worst within the general health and energy/fatigue domains                                                                                                                                                                                                                                                                                                                                                                                                                                                                                                                                                                                                                                                                 |
| Guilfoyle (2012) | Parenting stress                       | Disease Activity               | United States<br>$N=62$<br>Youth ( $M_{age} = 15.4 \pm 1.4$ ; 88.7% White)<br>Caregiver ( $M_{age} = 45.7 \pm 5.6$ )<br><br>CD $n=49$<br>UC $n=13$                    | Pediatric cancer, obesity, sickle cell disease, bladder exstrophy, type 1 diabetes | LCAI, PCDAI, PIP,            | Lower frequency of parenting stress associated with older parent age and 4-year college degree<br>Marital status and family socioeconomic status not associated with parenting stress<br>Lower parenting stress frequency in IBD than cancer, obesity, and sickle cell disease<br>Lower parenting stress difficulty in IBD than cancer, obesity, sickle cell disease, and bladder exstrophy<br>Similar levels of parenting stress frequency and difficulty in IBD compared to Type 1 diabetes<br>Compared to cancer, frequency of parenting stress associated with the subscales of Role Function and Emotional Functioning were lower in IBD<br>Compared to cancer, difficulty of parenting stress associated with the subscales of Communication, Medical Care, Role Function, and Emotional Distress was lower in IBD<br>Crohn's disease activity associated with parenting stress difficulty |
| Guilfoyle (2014) | Parenting Stress                       | Depression<br>Disease Activity | United States<br>$N=93$<br>Youth ( $M_{age} = 15.5 \pm 1.4$ ; 91.7% White) & Parents ( $M_{age} = 45.7 \pm 5.6$ )<br><br>CD $n=74$<br>UC $n=10$<br>Not reported $n=9$ | N/A                                                                                | CDI, LCAI, PCDAI, PIP        | Parenting stress at baseline accounted for significant variance in youth depressive symptoms at 6 months, controlling for disease severity<br>At baseline, parenting stress frequency and difficulty associated with disease symptoms.<br>At 6 months follow-up, only parenting stress frequency associated with disease symptoms.                                                                                                                                                                                                                                                                                                                                                                                                                                                                                                                                                               |
| Herzer (2011)    | Family Functioning                     | Disease Severity<br>HRQOL      | United States<br>$N=62$<br>Youth ( $M_{age} = 15.47 \pm 1.41$ ; 88.7% White) & Caregivers<br><br>CD $n=49$<br>UC $n=13$                                               | N/A                                                                                | FAD, IMPACT-III, LCAI, PCDAI | Parent report of clinically elevated difficulties in some aspect of family functioning ranged from 7.5%-25% of the sample<br>Greater familial difficulties with problem solving and communication, and greater difficulties in general family functioning associated with lower child HRQOL after controlling for disease severity                                                                                                                                                                                                                                                                                                                                                                                                                                                                                                                                                               |
| Hommel (2011)    | Family Barriers to Treatment Adherence | Treatment Adherence            | United States<br>$N=16$                                                                                                                                               | N/A                                                                                | LCAI, PCDAI,                 | Qualitative association between parent-child conflict about taking medications and poor treatment adherence                                                                                                                                                                                                                                                                                                                                                                                                                                                                                                                                                                                                                                                                                                                                                                                      |

|                 |                                                  |                                              |                                                                                                                                                                                                                        |                  |                                                                                                                                |                                                                                                                                                                                                                                                                                                                                                                                                                                                                                                                                                                                 |
|-----------------|--------------------------------------------------|----------------------------------------------|------------------------------------------------------------------------------------------------------------------------------------------------------------------------------------------------------------------------|------------------|--------------------------------------------------------------------------------------------------------------------------------|---------------------------------------------------------------------------------------------------------------------------------------------------------------------------------------------------------------------------------------------------------------------------------------------------------------------------------------------------------------------------------------------------------------------------------------------------------------------------------------------------------------------------------------------------------------------------------|
|                 |                                                  |                                              | Youth ( $M_{age} = 15.75 \pm 1.08$ ; 94% White)<br>$N=12$ Mothers ( $M_{age} = 46.44 \pm 5.32$ )<br>$N=4$ Fathers ( $M_{age} = 48.81 \pm 7.49$ )<br><br>CD $n=15$<br>UC $n=1$                                          |                  | Treatment adherence interview                                                                                                  | Family support, good parent-child relationship, and parental monitoring reported as facilitators to treatment adherence<br>Resolution of familial conflict by discussion rather than fighting enhanced adherence outcomes<br>Discussion about importance of transitioning allocation of responsibility to children from parents, but parents expressed uncertainty about when and how                                                                                                                                                                                           |
| Jelenova (2016) | Parenting Style<br>Anxiety<br>Depression<br>QoL  | QoL<br>Anxiety<br>Depression                 | Czech Republic<br>$N=27$<br>Youth ( $M_{age} = 15.1 \pm 1.20$ ) & Parents<br><br>CD $n=17$<br>UC $n=10$                                                                                                                | Healthy Controls | ADOR, BAI, BDI-II, CDI, KidScreen-10, PedsQL Family Impact Module, SAD                                                         | IBD mothers reported moderate levels of anxiety and significantly more anxiety than healthy control mothers. No difference in depression symptoms.<br>IBD fathers reported higher levels of depression than healthy control fathers. No difference in anxiety symptoms.<br>Lower QoL in IBD parents versus healthy control parents<br>No difference in parenting style between IBD and healthy control parents, except for fathers' positive parenting higher among controls.<br>Parenting style among IBD parents significantly related to child QoL, anxiety, and depression. |
| Kunz (2011)     | Family QoL<br>Parent QoL                         | Disease Activity<br>Psychosocial Functioning | United States<br>$N=95$<br>Youth ( $M_{age} = 15.07 \pm 2.16$ ; 96% White)<br>$N=92$ Mothers ( $M_{age} = 44.44 \pm 4.98$ )<br>$N=43$ Fathers ( $M_{age} = 45.54 \pm 5.81$ )<br><br>CD $n=80$<br>UC $n=12$<br>IC $n=3$ | N/A              | Pediatric Symptoms Checklist, PedsQL Family Impact Module, PGA                                                                 | Youth-reported emotional and behavioral adjustment demonstrated significant, positive relations with maternal, paternal, and family QOL<br>Worse disease activity associated with worse overall maternal, paternal, and family QoL<br>No significant differences in maternal and paternal reports of parent of family QOL.                                                                                                                                                                                                                                                      |
| Langer (2014)   | Pain Catastrophizing<br>Parent Responses to Pain | Pain Behavior                                | United States<br>$N=184$<br>Youth ( $M_{age} = 13.72 \pm 2.72$ ; 88% White) & Parents ( $M_{age} = 44.37 \pm 6.85$ ; 93% White)<br><br>CD $n=126$                                                                      | N/A              | Adult Responses to Children's Symptoms, Faces Pain Scale Revised, Pain Behavior Checklist, Pain Catastrophizing Scale – Parent | Parent pain catastrophizing was positively associated with greater child pain behavior.<br>Parent pain catastrophizing mediated the relationship between parent-reported child pain behavior and parental protective responses                                                                                                                                                                                                                                                                                                                                                  |

|                  |                                              |                                                       |                                                                                                                                                                   |                                                                          |                                                                         |                                                                                                                                                                                                                                                                                                                                                                                                    |
|------------------|----------------------------------------------|-------------------------------------------------------|-------------------------------------------------------------------------------------------------------------------------------------------------------------------|--------------------------------------------------------------------------|-------------------------------------------------------------------------|----------------------------------------------------------------------------------------------------------------------------------------------------------------------------------------------------------------------------------------------------------------------------------------------------------------------------------------------------------------------------------------------------|
|                  |                                              |                                                       | UC <i>n</i> =58                                                                                                                                                   |                                                                          |                                                                         |                                                                                                                                                                                                                                                                                                                                                                                                    |
| Loreaux (2015)   | Depression                                   | Depression HRQOL                                      | United States<br><i>N</i> =86<br>Youth ( <i>M</i> <sub>age</sub> = 14.10±1.93; 91.8% White)<br><br>CD <i>n</i> =65<br>UC <i>n</i> =18<br>IC <i>n</i> =3           |                                                                          | BASC-2,<br>BSI,<br>IMPACT-III<br>Partial Harvey-Bradshaw Index<br>PUCAI | Caregiver depression moderated the relation between youth depression and HRQOL, after controlling for disease activity, only among youth whose parents reported high levels of depression                                                                                                                                                                                                          |
| Mackner (2005)   | Family Functioning                           | Medication Adherence                                  | United States<br><i>N</i> =50<br>Youth ( <i>M</i> <sub>age</sub> = 14.69±1.92; 90% White) & Parents<br><br>CD <i>n</i> =38<br>UC <i>n</i> =4<br>IBD-U <i>n</i> =8 | N/A                                                                      | Adherence interview, FAD                                                | Better family functioning, especially establishing rules and consequences for behavior, was associated with higher adherence                                                                                                                                                                                                                                                                       |
| Mackner (2006)   | Family Functioning                           | N/A                                                   | United States<br><i>N</i> =50<br>Youth ( <i>M</i> <sub>age</sub> = 14.39; 87% White) & Parents                                                                    | Healthy Controls                                                         | FAD                                                                     | Similar levels of family functioning between youth with IBD and healthy controls, except for increased impairments in family communication in IBD                                                                                                                                                                                                                                                  |
| Odell (2011)     | Parenting Stress<br>Family Functioning       | Behavioral Problems<br>Depression<br>Disease Severity | United States<br><i>N</i> =45<br>Youth ( <i>M</i> <sub>age</sub> = 15.41±1.32; 89% White) & Parents<br><br>CD <i>n</i> =36<br>UC <i>n</i> =9                      | N/A                                                                      | CBCL,<br>CDI,<br>FAD,<br>LCAI,<br>PIP,<br>PUCAI,<br>YSR                 | Parent-reported family dysfunction was not significantly related to youth depressive symptoms or disease severity.<br>Child externalizing problems, but not internalizing problems, significantly associated with family dysfunction<br>Parenting stress not significantly related to family functioning                                                                                           |
| Plevinsky (2018) | Parenting stress<br>Psychosocial Functioning | Psychosocial Functioning<br>Disease Activity          | United States<br><i>N</i> =51<br>Youth ( <i>M</i> <sub>age</sub> = 17.92±0.94; 86.3% White) & Parents<br><br>CD <i>n</i> =37<br>UC <i>n</i> =13<br>IC <i>n</i> =1 | Younger IBD sample ( <i>N</i> =48; <i>M</i> <sub>age</sub> = 14.89±1.15) | BSI,<br>PGA,<br>PIP                                                     | Higher parenting stress frequency and difficulty associated with worse youth and parent psychosocial functioning, and worse disease activity<br>Child age and gender not related to parenting stress<br>Items in emotional distress domain most commonly endorsed<br>Parenting stress unrelated to illness duration<br>Baseline parenting stress related to higher disease activity 6 months later |

|                    |                                                         |                                                 |                                                                                                                                                          |                                    |                                                                                                        |                                                                                                                                                                                                                                                                                                                                                                                                                                                                                                                                                                                        |
|--------------------|---------------------------------------------------------|-------------------------------------------------|----------------------------------------------------------------------------------------------------------------------------------------------------------|------------------------------------|--------------------------------------------------------------------------------------------------------|----------------------------------------------------------------------------------------------------------------------------------------------------------------------------------------------------------------------------------------------------------------------------------------------------------------------------------------------------------------------------------------------------------------------------------------------------------------------------------------------------------------------------------------------------------------------------------------|
| Reed-Knight (2011) | Family Responsibility, Sources of parent-child conflict | Medication Adherence                            | United States<br>N=90<br>Youth ( $M_{age} = 14.72 \pm 2.24$ ; 78% White) & Caregivers<br><br>CD $n=67$<br>UC $n=23$                                      | N/A                                | IBD Family Responsibility Questionnaire, Issues Checklist, Medical Adherence Measure                   | Less perceived conflict between parent and child and greater maternal involvement in IBD management was associated with better medication adherence<br><br>No associations were found between adolescent-reported adherence and parent-child conflict or maternal involvement.                                                                                                                                                                                                                                                                                                         |
| Reed-Knight (2016) | Depression                                              | Disease Activity, HRQOL, Internalizing Symptoms | United States<br>N=83<br>Youth ( $M_{age} = 14.77 \pm 2.29$ ; 78.3% White) & Caregivers<br><br>CD $n=63$<br>UC $n=20$                                    | N/A                                | BASC-2, IMPACT-III, PCDAI, PUCAI, SCL-90 Revised                                                       | Greater disease activity was associated with greater child internalizing symptoms, which in turn related to higher caregiver depressive symptoms and lower caregiver HRQOL                                                                                                                                                                                                                                                                                                                                                                                                             |
| Reed-Knight (2018) | Family Stress                                           | Depression, Pain Coping, Pain Distress          | United States<br>N=183<br>Youth ( $M_{age} = 13.75 \pm 2.70$ ; 88% White) & Parents ( $M_{age} = 44.38 \pm 6.87$ ; 92.9%)<br><br>CD $n=125$<br>UC $n=58$ | N/A                                | CDI, FILE, Pain Behavior Checklist, Pain Response Inventory                                            | Parents most commonly reported family stressors related to financial strain regarding medical expenses, food, clothing, energy, and home care.<br><br>Greater family stress positively related to children's pain-related expressions of distress and passive coping<br><br>Family stress positively related to youth self-reported depressive symptoms                                                                                                                                                                                                                                |
| Schuman (2013)     | Family Functioning                                      | Depression, Disease Severity                    | United States<br>N=122<br>Youth ( $M_{age} = 15.7 \pm 1.3$ ; 86.7% White) & Parents<br><br>CD $n=96$<br>UC $n=26$                                        | N/A                                | CBCL, CDI, FAD, LCAI, PCDAI                                                                            | Approximately 12% and 32% of parents reported clinically significant difficulties with family problem-solving and affective involvement, respectively.<br><br>The specific family functioning domain of family affective involvement was positively associated with parent-reported youth depressive symptoms.<br><br>The specific family functioning domain of family problem-solving was negatively associated with self-reported youth depressive symptoms.<br><br>Neither family functioning variable moderated the relationship between disease activity and depressive symptoms. |
| Szajnberg (2011)   | Attachment Psychosocial Functioning                     | Disease Severity                                | United States<br>N=21<br>Youth ( $M_{age} = 12.8$ ) & Mothers<br><br>CD $n=16$<br>UC $n=5$                                                               | Pediatric cancer and renal disease | Adult Attachment Interview, Clinician's Objective Burden of Illness Index, Impact on the Family Scale, | IBD mothers had a higher proportion of insecure adult attachment as compared to pediatric cancer and renal disease mothers.<br><br>IBD mothers with insecure attachment scored higher on measures of psychiatric symptoms, including depression<br><br>No differences found between groups on the impact of the child's illness on family members                                                                                                                                                                                                                                      |

|                  |                                                                                            |                                                                                              |                                                                                                                                                                                                                                                                 |                     | Million Clinical<br>Multi-Axial<br>Inventory-II                                                                                                        |                                                                                                                                                                                                                                                                                                                                                                                                                                                                                |
|------------------|--------------------------------------------------------------------------------------------|----------------------------------------------------------------------------------------------|-----------------------------------------------------------------------------------------------------------------------------------------------------------------------------------------------------------------------------------------------------------------|---------------------|--------------------------------------------------------------------------------------------------------------------------------------------------------|--------------------------------------------------------------------------------------------------------------------------------------------------------------------------------------------------------------------------------------------------------------------------------------------------------------------------------------------------------------------------------------------------------------------------------------------------------------------------------|
| Tojek<br>(2002)  | Family Functioning<br>Physical Signs and<br>Symptoms<br>Positive and<br>Negative<br>Affect | Bowel Movement<br>Frequency,<br>Depression,<br>Functional<br>Disability, Pain and<br>Fatigue | United States<br><i>N</i> =62<br>Youth ( <i>M</i> <sub>age</sub> = 15.05)<br>& Mothers<br><br><i>CD n</i> =35<br><i>UC n</i> =26                                                                                                                                | N/A                 | CDI,<br>FAD,<br>Functional<br>Disability Index,<br>Pennebaker<br>Inventory of<br>Limbic<br>Languidness,<br>Positive and<br>Negative Affect<br>Schedule | Family dysfunction positively correlates with youth bowel movement frequency and pain/fatigue<br>Family dysfunction was not correlated with youth depression<br>Mother's positive affect was negatively correlated with youth depression, functional disability, and bowel movement frequency                                                                                                                                                                                  |
| Werner<br>(2015) | Psychosocial<br>Functioning                                                                | Behavior Problems<br>Time since<br>diagnosis                                                 | Switzerland<br><i>N</i> =125<br>Youth ( <i>M</i> <sub>age</sub> =<br>13.3±2.8)<br><i>N</i> =125 Mothers ( <i>M</i> <sub>age</sub><br>= 43.7±4.8)<br><i>N</i> =106 Fathers ( <i>M</i> <sub>age</sub> =<br>46.4±5.5)<br><br><i>CD n</i> =70<br><i>UC/IC n</i> =55 | Normative<br>Sample | Strengths and<br>Difficulties<br>Questionnaire,<br>Symptom<br>Checklist 27                                                                             | IBD mothers reported significantly more symptoms of dysthymia, social phobia, and overall symptom score than the normative sample<br>IBD fathers reported fewer symptoms of depression, agoraphobia, social phobia, and better overall functioning compared to normative sample<br>Poorer mental health in both parents was associated with shorter time since child's IBD diagnosis<br>Higher levels of child behavior problems associated with poorer maternal mental health |

A-SADS-L = Adult Schedule for Affective Disorders and Schizophrenia, Lifetime Version; BAI = Beck Anxiety Inventory; BASC-2 = Behavior Assessment Scale for Children, second edition; BDI-II = Beck Depression Inventory, second version; BSI = Brief Symptom Inventory; CAS = Children Assessment Schedule; CBCL = Child Behavior Checklist; CD = Crohn's disease; CDI = Children's Depression Inventory; CHQ-CF 87 = Child Health Questionnaire-Child Form 87; FAD = Family Assessment Device; FILE = Family Inventory of Life Events; FRI = Family Relationship Index ; HRQOL = health related quality of life; IBD-U = Unspecified IBD; IC = indeterminate colitis; ISSI = Interview Schedule for Social Interaction; LCAI = Lichtiger Colitis Activity Index; PCDAI = Pediatric Crohn's Disease Activity Index; PedsQL = Pediatric Quality of Life Inventory 4.0; PGA = Physician Global Assessment; PIP = Pediatric Inventory for Parents; PUCAI = Pediatric Ulcerative Colitis Activity Index; QoL = quality of life; SAD = Scale of Anxiety in Children; SCL-90 = Symptom Check-List 90; shPCDAI = short Pediatric Crohn's Disease Activity Index; UC = ulcerative colitis; YSR = Youth Self-Report.
